# Supplementary material for: Structural Characterization of Exopolysaccharide Produced by Leuconostoccitreum B-2 Cultured in Molasses Medium and Its Application in Set Yogurt
Source: MDPI journal article supplement (doi:10.3390/pr10050891), 2022-04-30
Supplement: s1 [file s1]

# Structural Characterization of Exopolysaccharide Produced by *Leuconostoc citreum* B-2 Cultured in Molasses Medium and Its Application in Set Yogurt

Lu Liang, Min Xu, Lei Pan, Zhijiang Zhou and Ye Han \*

School of Chemical Engineering and Technology, Tianjin University, Tianjin 300072, China; llu@tju.edu.cn (L.L.); minxu@tju.edu.cn (M.X.); panlei@tju.edu.cn (L.P.); zzj@tju.edu.cn (Z.Z.)

\* Correspondence: hanye@tju.edu.cn. Tel: +86-137-0209-5425

**Table S1.** Assigned concentrations of variables at different levels in Plackett-Burman design for M-EPS production.

| Variable                   | Parameter | High level (+1) | Central point (0) | Low level (-1) |
|----------------------------|-----------|-----------------|-------------------|----------------|
| Molasses (g/L)             | $X_1$     | 275             | 200               | 125            |
| Peptone (g/L)              | $X_2$     | 12              | 8                 | 4              |
| Yeast extract powder (g/L) | $X_3$     | 8               | 6                 | 4              |
| Beef extract powder (g/L)  | $X_4$     | 16              | 12                | 8              |
| Sodium acetate (g/L)       | $X_5$     | 6               | 4                 | 2              |
| $K_2HPO_4$ (g/L)           | $X_6$     | 5               | 3                 | 1              |
| Ammonium citrate (g/L)     | $X_7$     | 10              | 6                 | 2              |
| Initial pH                 | $X_8$     | 10              | 9                 | 8              |

**Table S2.** Range of different factors studied in the central composite design.

| Variable quantity         | Parameter | Level  |     |      |     |        |
|---------------------------|-----------|--------|-----|------|-----|--------|
|                           |           | -1.682 | -1  | 0    | +1  | +1.682 |
| Molasses (g/L)            | $X_1$     | 232.96 | 250 | 275  | 300 | 317.05 |
| Beef extract powder (g/L) | $X_4$     | 7.98   | 9   | 10.5 | 12  | 13.02  |
| Initial pH                | $X_8$     | 7.73   | 8   | 8.4  | 8.8 | 9.07   |

**Table S3.** The equal variance test of Plackett-Burman experimental results.

| Method           | $F$ -value | Molecular freedom | Denominator degrees of freedom | $P >  F $ |
|------------------|------------|-------------------|--------------------------------|-----------|
| F-bilateral test | 1218.2417  | 11                | 2                              | 0.0016*   |

**Table S4.** The  $t$ -test of Plackett-Burman experimental results.

| Method                  | Molecular freedom | Denominator degrees of freedom | $P >  t $ |
|-------------------------|-------------------|--------------------------------|-----------|
| Assume equal variance   | 11                | 2                              | 0.3610    |
| Assume unequal variance | 11                | 2                              | 0.0777    |

**Table S5.** Verification results of RSM optimization model.

| Parameter              | M-EPS (g/L)  |
|------------------------|--------------|
| Model prediction value | 47.611       |
|                        | 46.62 ± 0.44 |
|                        | 46.50 ± 0.04 |
| Validation value       | 46.83 ± 0.33 |
|                        | 46.60 ± 0.16 |
|                        | 47.45 ± 0.44 |
|                        | 47.17 ± 0.40 |

**Table S6.** The *t*-test of verification results of RSM optimization model.

| Method         | Freedom | Standard deviation | $P >  t $ |
|----------------|---------|--------------------|-----------|
| <i>t</i> -test | 5       | 0.3751             | 0.1234    |

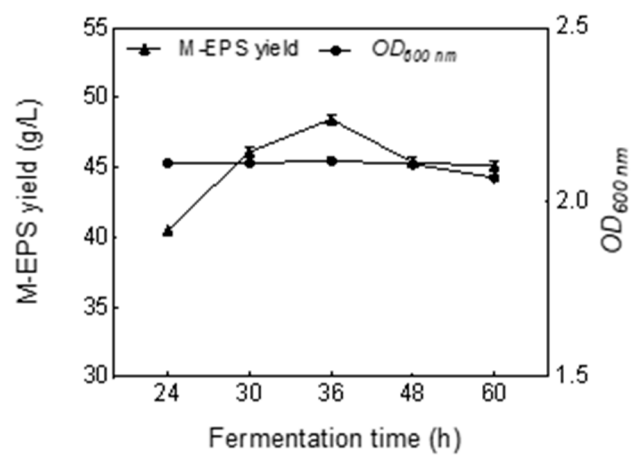

**Figure S1.** Time course for cellular growth and M-EPS yield by *Leu. citreum* B-2 under the optimized conditions. Different condition was illustrated as triangle (▲: M-EPS production), circle (●:  $OD_{600nm}$ ).
